# Supplementary material for: Reticular synthesis of 8-connected carboxyl hydrogen-bonded organic frameworks for white-light-emission
Source: Royal Society of Chemistry journal article supplement (doi:10.1039/d3sc06410g), 2024-01-01
Supplement: d3sc06410g1.pdf [file d3sc06410g1.pdf]

## Supporting Information

# Reticular synthesis of bcu topological hydrogen-bonded organic frameworks for white-light-emission

Xiao-Juan Xi,<sup>a</sup> Yang Li,<sup>b</sup> Feifan Lang,<sup>b</sup> Jiandong Pang<sup>\*b</sup> and Xian-He Bu<sup>\*a,b</sup>

<sup>a</sup> College of Chemistry, State Key Laboratory of Elemento-Organic Chemistry, Nankai University, Tianjin 300071, P. R. China.

<sup>b</sup> School of Materials Science and Engineering, Smart Sensing Interdisciplinary Science Center, TKL of Metal and Molecule-Based Material Chemistry, Collaborative Innovation Center of Chemical Science and Engineering, Nankai University, Tianjin 300350, P. R. China.

\* Corresponding authors

E-mail address: jdpang@nankai.edu.cn (J. Pang), buxh@nankai.edu.cn (X.-H. Bu)

|                                                          |    |
|----------------------------------------------------------|----|
| Experimental Procedures .....                            | 1  |
| Synthesis of H <sub>8</sub> PEP-OBu .....                | 1  |
| Synthesis of H <sub>8</sub> PEP-OMe .....                | 3  |
| Synthesis of HOFs .....                                  | 3  |
| Single-crystal X-ray diffraction analysis (SCXRD) .....  | 4  |
| Results and Discussion .....                             | 4  |
| Energy transfer efficiency study by decay lifetime ..... | 14 |
| References .....                                         | 15 |

All chemicals and reagents were received from commercial suppliers and were used directly without additional purification. <sup>1</sup>H NMR spectra were recorded on a Bruker AV400 Nuclear Magnetic Resonance Spectrometer. Single-crystal X-ray diffraction analysis (SCXRD) were performed on a Rigaku XtalAB PRO MM007 DW diffractometer (Cu-Kα λ = 1.54178 Å). Powder X-ray diffraction (PXRD) test were carried out using a Rigaku MiniFlex600 diffractometer equipped with a Cu-target tube at 40 kV and 15mA. PXRD tests at 100 K were conducted on a a Rigaku XtalAB PRO MM007 DW diffractometer (Cu-Kα λ = 1.54178 Å). Specifically, the crystals were picked out from the mother liquid, transferred to the oil, crushed with a needle, and then mounted on the loop ring for PXRD determination at 100 K. The thermogravimetric analyses (TGA) were conducted on a Rigaku Thermo Plus EVO2 8121 thermal analyzer. UV-vis absorption spectra were obtained using a Thermo scientific UV-vis Evolution 220 spectrophotometer. Fourier transform infrared (FTIR) spectra were recorded on a TENSOR 37 spectrometer. The photoluminescence (PL) spectra, PL decay curve, and absolute photoluminescence quantum yields were measured on an Edinburgh instruments FS5 spectrophotometer. The ESP diagram based on single-crystal structure was obtained by the Material Studio software using the gradient approximation (GGA) with the Perdew-Burke-Ernzerhof (PBE) functional in Dmol3 module. The size of the dye molecules was calculated by bringing the atomic coordinates of the dye molecule obtained in the Chem3D software into the small program on the web page <http://jerkwin.github.io/2016/06/24/%E5%88%86%E5%AD%90%E5%B0%BA%E5%AF%B8%E5%A4%A7%E5%B0%8F%E7%9A%84%E8%AE%A1%E7%AE%97/>

## Experimental Procedures

### Synthesis of H<sub>8</sub>PEP-OBu

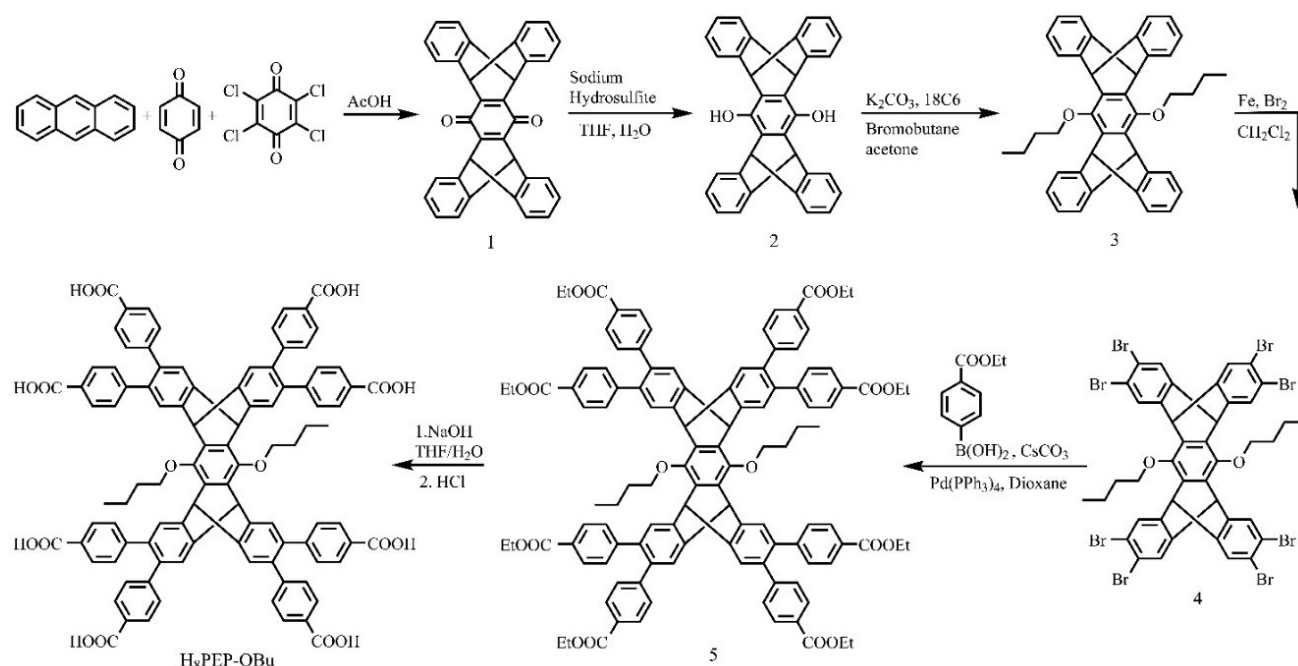

**Scheme S1** Synthesis of H<sub>8</sub>PEP-OBu.

**Synthesis of compound 1.** Anthracene (10.69 g, 60 mmol), 1,4-benzoquinone (3.24 g, 30 mmol), and p-chloranil (14.75 g, 60 mmol) were dissolved in acetic acid (300 mL). The mixture was stirred at 125 °C for 16 h. After cooled to room temperature, the mixture was poured into water (300 mL). The residue was collected by filtration, washed several times by hot water, and dried under vacuum to afford yellow powder (13.11 g, yield: 95%). <sup>1</sup>H NMR (400 MHz, CDCl<sub>3</sub>): δ 7.37 (d, 8H), 6.98 (d, 8H), 5.75 (s, 4H) ppm.

**Synthesis of compound 2.** Compound 1 (7.82 g, 17 mmol) was dissolved in 200 mL anhydrous tetrahydrofuran, followed with the addition of 140 mL sodium hydrosulfite (35.52 g, 204 mmol) aqueous solution. The reaction mixture was heated at 40 °C for 15 h under N<sub>2</sub> atmosphere and then cooled to room temperature. Tetrahydrofuran was removed using rotary evaporation and resulting precipitate was filtered and washed sequentially with hot water and acetone, and dried under 50 °C to afford white powder (7.67 g, 98%). <sup>1</sup>H NMR (400 MHz, CDCl<sub>3</sub>): δ 7.33 (d, 8H), 6.94 (d, 8H), 5.64 (s, 4H) ppm.

**Synthesis of compound 3.** Compound 2 (7.67 g, 16.60 mmol), K<sub>2</sub>CO<sub>3</sub> (11.47 g, 83 mmol), and catalytic amount of 18-crown-6 (18C6) (50 mg), bromobutane (16.10 mL, 150 mmol) were dissolved in acetone (300 mL). The reaction mixture was heated at 65 °C for 15 h under N<sub>2</sub> atmosphere and then cooled to room temperature. Acetone was removed using rotary evaporation and resulting precipitate was washed with hot water, and dried under vacuum to afford white powder (7.67 g, 95%). <sup>1</sup>H NMR (400 MHz, CDCl<sub>3</sub>): δ 7.32 (d, 8H), 6.94 (d, 8H), 5.64 (s, 4H), 3.90 (t, 4H), 1.99 (m, 4H), 1.73 (m, 4H), 1.14 (t, 6H) ppm.

**Synthesis of compound 4.** Compound 3 (57.4 mg, 1 mmol) and catalytic amount iron filings (160 mg) were dissolved in 60 mL anhydrous CH<sub>2</sub>Cl<sub>2</sub> (60 mL) in a dried 100 mL flask. Then, bromine (0.53 mL, 9.7 mmol) was added to the flask. The reaction mixture was heated at 45 °C for 1.5 h under N<sub>2</sub> atmosphere and then cooled to room temperature. The mixture was washed with sodium thiosulfate aqueous solution and then extracted with CH<sub>2</sub>Cl<sub>2</sub>. The organic phase was purified by chromatography to give yellow solid, which was washed with ethanol to provide 4 as pale yellow solid (890 mg, 74%). <sup>1</sup>H NMR (400 MHz, CDCl<sub>3</sub>): δ 7.56 (s, 8H), 5.51 (s, 4H), 3.86 (t, 4H), 1.96 (m, 4H), 1.72 (m, 4H), 1.50 (m, 4H), 1.16 (t, 6H) ppm.

**Synthesis of compound 5.** Compound 4 (2.55 g, 2 mmol), (4-(ethoxycarbonyl)phenyl)boronic acid (4.66 g, 24 mmol), CsCO<sub>3</sub> (10.43 g, 32 mmol), and tetrakis(triphenylphosphine)palladium (0.46 g, 0.4 mmol) were added to a 500-mL Schlenk flask. The flask was pumped under vacuum and refilled with N<sub>2</sub> three times before 250 mL degassed 1,4-dioxane was transferred to the system. The reaction mixture was heated to 85 °C for 72 h under a N<sub>2</sub> atmosphere. After the reaction mixture cooled to room temperature, the organic solvent was removed using a rotary evaporator, and the resulting mixture was poured into water and extracted with CH<sub>2</sub>Cl<sub>2</sub> (3×50 mL). The combined organic layers were dried over anhydrous MgSO<sub>4</sub>, and then the solvent was removed using a rotary evaporator. After purification by column chromatography on silica gel using CH<sub>2</sub>Cl<sub>2</sub> as eluent and evaporation of fraction containing the product, compound 5 was

obtained as a pale yellow solid (1.66 g, 45%).  $^1\text{H}$  NMR (400 MHz,  $\text{CDCl}_3$ ):  $\delta$  7.85 (d, 16H), 7.48 (s, 8H), 7.08 (d, 16H), 5.89 (s, 4H), 4.35 (q, 16H), 3.75 (t, 4H), 2.02 (m, 4H), 1.72 (m, 4H), 1.36 (t, 24H), 1.25 (t, 6H) ppm.

**Synthesis of compound  $\text{H}_8\text{PEP-OBu}$ .** Compound 5 (1.66 g, 0.9 mmol) was dissolved in 40 mL of THF, to which 40 mL of NaOH (2.16 g, 54 mmol) aqueous solution was added. The mixture was heated to 70 °C for 10 h, and then the organic solvent was removed using a rotary evaporator. The aqueous phase was acidified to pH = 3 using HCl. The resulting precipitate was collected via filtration, washed with water several times, and dried under vacuum to afford  $\text{H}_8\text{PEP-OBu}$  (1.33 g, 96%).  $^1\text{H}$  NMR (400 MHz,  $\text{DMSO}-d_6$ ):  $\delta$  12.92 (s, 8H), 7.75 (d, 16H), 7.57 (s, 8H), 7.15 (d, 16H), 6.06 (s, 4H), 4.03 (t, 4H), 1.97 (m, 4H), 1.68 (m, 4H), 1.01 (t, 6H) ppm.

## Synthesis of $\text{H}_8\text{PEP-OMe}$

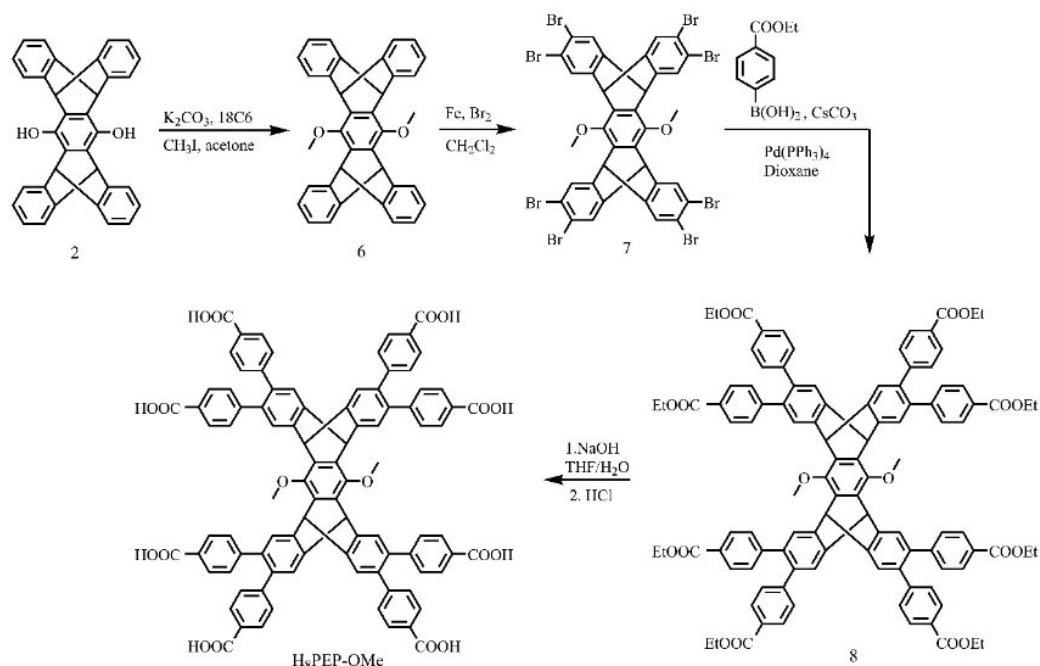

**Scheme S2** Synthesis of  $\text{H}_8\text{PEP-OMe}$ .

**Synthesis of compound 6.** Compound 2 (0.93 g, 2 mmol),  $\text{K}_2\text{CO}_3$  (1.38 g, 10 mmol), and catalytic amount of 18-crown-6 (6 mg), and methyl iodide (1.1 mL, 18 mmol) were dissolved in acetone (35 mL). The reaction mixture was heated at 65 °C for 15 h under  $\text{N}_2$  atmosphere and then cooled to room temperature. Acetone was removed using rotary evaporation and resulting precipitate was washed with hot water, and dried under vacuum to afford white powder (0.75 g, 76%).  $^1\text{H}$  NMR (400 MHz,  $\text{CDCl}_3$ ):  $\delta$  7.35 (d, 8H), 6.96 (d, 8H), 5.68 (s, 4H), 3.88 (s, 6H) ppm.

**Synthesis of compound 7.** Compound 6 (490 mg, 1 mmol) and catalytic amount iron filings (160 mg) were dissolved in 60 mL anhydrous  $\text{CH}_2\text{Cl}_2$  (60 mL) in a dried 100 mL flask. Then, bromine (0.53 mL, 9.7 mmol) was added to the flask. The reaction mixture was heated at 45 °C for 1.5 h under  $\text{N}_2$  atmosphere and then cooled to room temperature. The mixture was washed with sodium thiosulfate aqueous solution and then extracted with  $\text{CH}_2\text{Cl}_2$ . The organic phase was purified by chromatography to give yellow solid, which was washed with ethanol to provide 7 as pale yellow solid (835 mg, 75%).  $^1\text{H}$  NMR (400 MHz,  $\text{CDCl}_3$ ):  $\delta$  7.58 (s, 8H), 5.54 (s, 4H), 3.86 (s, 6H) ppm.

**Synthesis of compound 8.** Compound 7 (2.24 g, 2 mmol), (4-(ethoxycarbonyl)phenyl)boronic acid (4.66 g, 24 mmol),  $\text{CsCO}_3$  (10.43 g, 32 mmol), and tetrakis(triphenylphosphine)palladium (0.46 g, 0.4 mmol) were added to a 500-mL Schlenk flask. The flask was pumped under vacuum and refilled with  $\text{N}_2$  three times before 250 mL degassed 1,4-dioxane was transferred to the system. The reaction mixture was heated to 85 °C for 72 h under a  $\text{N}_2$  atmosphere. After the reaction mixture cooled to room temperature, the organic solvent was removed using a rotary evaporator, and the resulting mixture was poured into water and extracted with  $\text{CH}_2\text{Cl}_2$  (3×50 mL). The combined organic layers were dried over anhydrous  $\text{MgSO}_4$ , and then the solvent was removed using a rotary evaporator. After purification by column chromatography on silica gel using  $\text{CH}_2\text{Cl}_2$  as eluent and evaporation of fraction containing the product, compound 8 was obtained as a pale yellow solid (2.48 g, 74%).  $^1\text{H}$  NMR (400 MHz,  $\text{CDCl}_3$ ):  $\delta$  7.85 (d, 16H), 7.51 (s, 8H), 7.09 (d, 16H), 5.91 (s, 4H), 4.34 (q, 16H), 3.98 (s, 6H), 1.39 (t, 24H) ppm.

*Synthesis of compound H<sub>8</sub>PEP-OMe.* Compound 8 (2.48 g, 1.5 mmol) was dissolved in 40 mL of THF, to which 40 mL of NaOH (3.6 g, 90 mmol) aqueous solution was added. The mixture was heated to 70 °C for 10 h, and then the organic solvent was removed using a rotary evaporator. The aqueous phase was acidified to pH = 3 using HCl. The resulting precipitate was collected via filtration, washed with water several times, and dried under vacuum to afford H<sub>8</sub>PEP-OMe (2.07 g, 95%). <sup>1</sup>H NMR (400 MHz, DMSO-*d*<sub>6</sub>): δ 7.75 (d, 16H), 7.61 (s, 8H), 7.15 (d, 16H), 6.11 (s, 4H), 3.94 (s, 6H) ppm.

## Synthesis of HOFs

*Synthesis of NKM-HOF-1:* H<sub>8</sub>PEP-OBu (15 mg), THF (6 mL), and methyl benzoate (MB) (3 mL) were charged in a 20 ml Pyrex vial. The mixture was heated in an 80 °C oven for 3 days, crystals of NKM-HOF-1 were harvested (yield: 68%).

*Synthesis of NKM-HOF-2:* H<sub>8</sub>PEP-OMe (15 mg), THF (6 mL), and methyl benzoate (MB) (3 mL) were charged in a 20 ml Pyrex vial. The mixture was heated in an 80 °C oven for 3 days, crystals of NKM-HOF-1 were harvested (yield: 65%).

## Single-crystal X-ray diffraction analysis (SCXRD)

All as-crystals were picked out from the mother liquid, transferred to oil, and mounted on the loop ring for SCXRD. For NKM-HOF-1 and NKM-HOF-2, diffraction data were tested on a Rigaku XtaLAB Pro MM007 DW diffractometer equipped with Cu-K $\alpha$  radiation ( $\lambda$  = 1.54184 Å) at 100 K. Data collection and reduction were conducted using the program CrysAlisPro.<sup>[1]</sup> The structures were solved using intrinsic phasing methods (SHELXT-2018/3), and refined by full-matrix least-squares on  $F^2$  using OLEX2.<sup>[2, 3]</sup> Imposed restraints of each structure were described in the CIF files. Therefore, only the basic strategy of structural refinement is presented here. All non-hydrogen atoms were refined anisotropically, and the hydrogen atoms were included on geometrically calculated positions. Crystal data are summarized in Table S1 and S2. Crystal data have been deposited at the Cambridge Crystallographic Data Centre (CCDC), under CCDC numbers of 2311161 and 2311164.

## Results and Discussion

**Table S1** Crystallographic data and structure refinement for NKM-HOF-1 and NKM-HOF-2.

| Identification code                         | NKM-HOF-1                                                      | NKM-HOF-2                                                      |
|---------------------------------------------|----------------------------------------------------------------|----------------------------------------------------------------|
| CCDC number                                 | 2311161                                                        | 2311164                                                        |
| Empirical formula                           | C <sub>122</sub> H <sub>84</sub> O <sub>24</sub>               | C <sub>116</sub> H <sub>82</sub> O <sub>24</sub>               |
| Formula weight                              | 1943.97                                                        | 1859.81                                                        |
| Temperature/K                               | 99.99(10)                                                      | 99.98(10)                                                      |
| Crystal system                              | orthorhombic                                                   | orthorhombic                                                   |
| Space group                                 | Pnma                                                           | Pnma                                                           |
| a/Å                                         | 18.3338(5)                                                     | 18.3974(3)                                                     |
| b/Å                                         | 25.9671(7)                                                     | 26.3784(3)                                                     |
| c/Å                                         | 37.9645(8)                                                     | 37.7312(4)                                                     |
| α/°                                         | 90                                                             | 90                                                             |
| β/°                                         | 90                                                             | 90                                                             |
| γ/°                                         | 90                                                             | 90                                                             |
| Volume/Å <sup>3</sup>                       | 18074.0(8)                                                     | 18310.7(4)                                                     |
| Z                                           | 4                                                              | 4                                                              |
| ρ <sub>calc</sub> /cm <sup>3</sup>          | 0.714                                                          | 0.675                                                          |
| μ/mm <sup>-1</sup>                          | 0.406                                                          | 0.388                                                          |
| F(000)                                      | 4072.0                                                         | 3880.0                                                         |
| Crystal size/mm <sup>3</sup>                | 0.3 × 0.2 × 0.1                                                | 0.3 × 0.2 × 0.1                                                |
| Radiation                                   | Cu Kα (λ = 1.54184)                                            | Cu Kα (λ = 1.54184)                                            |
| 2θ range for data collection/°              | 4.656 to 151.672                                               | 4.088 to 152.544                                               |
| Index ranges                                | -23 ≤ h ≤ 21, -32 ≤ k ≤ 15, -43 ≤ l ≤ 47                       | -22 ≤ h ≤ 23, -32 ≤ k ≤ 15, -47 ≤ l ≤ 45                       |
| Reflections collected                       | 67768                                                          | 71805                                                          |
| Independent reflections                     | 18526 [R <sub>int</sub> = 0.0370, R <sub>sigma</sub> = 0.0306] | 18813 [R <sub>int</sub> = 0.0264, R <sub>sigma</sub> = 0.0259] |
| Data/restraints/parameters                  | 18526/181/729                                                  | 18813/39/677                                                   |
| Goodness-of-fit on F <sup>2</sup>           | 1.382                                                          | 1.361                                                          |
| Final R indexes [I > 2σ (I)]                | R <sub>1</sub> = 0.1155, wR <sub>2</sub> = 0.3421              | R <sub>1</sub> = 0.1085, wR <sub>2</sub> = 0.3230              |
| Final R indexes [all data]                  | R <sub>1</sub> = 0.1348, wR <sub>2</sub> = 0.3628              | R <sub>1</sub> = 0.1221, wR <sub>2</sub> = 0.3410              |
| Largest diff. peak/hole / e Å <sup>-3</sup> | 0.61/-0.65                                                     | 0.55/-0.59                                                     |

$$R_1 = \sum ||F_o| - |F_c|| / \sum |F_o|, wR_2 = [\sum w(F_o^2 - F_c^2)^2 / \sum w(F_o^2)^2]^{1/2}$$

**Table S2** O··H hydrogen bond lengths and O-H··O bond angles in NKM-HOF-1 and NKM-HOF-2.

| NKM-HOF-1 |              |          |              |                |           |
|-----------|--------------|----------|--------------|----------------|-----------|
| O··H      | Distance (Å) | O··O     | Distance (Å) | O-H··O         | Angle (°) |
| O14-H7#2  | 1.807        | O5-O11#2 | 2.573        | O5-H5-O11#2    | 173.3     |
| O11#2-H5  | 1.737        | O7#2-O14 | 2.632        | O7#2-H7-O14    | 166.8     |
| O9#3-H2   | 1.802        | O2-O9#3  | 2.637        | O2-H2-O9#3     | 172.2     |
| O8-H12#3  | 1.772        | O12#3-O8 | 2.605        | O12#2-H12#3-O8 | 170.8     |
| O9-H2#1   | 1.802        | O2#1-O9  | 2.637        | O12-H12-O8#1   | 170.8     |
| O8#1-H12  | 1.772        | O12-O8#1 | 2.605        | O2#1-H2#1-O9   | 172.1     |
| O11-H5#4  | 1.737        | O5#4-O11 | 2.573        | O7-H7-O14#4    | 166.8     |
| O14#4-H7  | 1.807        | O7-O14#4 | 2.632        | O5#4-H5#4-O11  | 173.3     |
| NKM-HOF-2 |              |          |              |                |           |
| O··H      | Distance (Å) | O··O     | Distance (Å) | O-H··O         | Angle (°) |
| O2#3-H11  | 1.806        | O7-O12#2 | 2.634        | O7-H7-O12#2    | 176.7     |
| O2-H11#1  | 1.806        | O7#4-O12 | 2.634        | O5#2-H5#2-O3   | 158.3     |
| O12#2-H7  | 1.795        | O11#1-O2 | 2.630        | O8#3-H8#3-O14  | 163.8     |
| O12-H7#4  | 1.795        | O11-O2#3 | 2.630        | O11-H11-O2#3   | 166.8     |
| O3-H5#2   | 1.779        | O5-O3#4  | 2.578        | O5-H5-O3#4     | 158.3     |
| O3#4-H5   | 1.779        | O5#2-O3  | 2.578        | O7#4-H7#4-O12  | 176.7     |
| O14#1-H8  | 1.760        | O8#3-O14 | 2.578        | O11#1-H11#1-O2 | 166.8     |
| O14-H8#3  | 1.760        | O8-O14#1 | 2.578        | O8-H8-O14#1    | 163.8     |

Symmetry codes: #1: 3/2-x, 1-y, 1/2+z; #2: 1/2-x, 1-y, -1/2+z; #3: 3/2-x, 1-y, -1/2+z; #4: 1/2-x, 1-y, 1/2+z

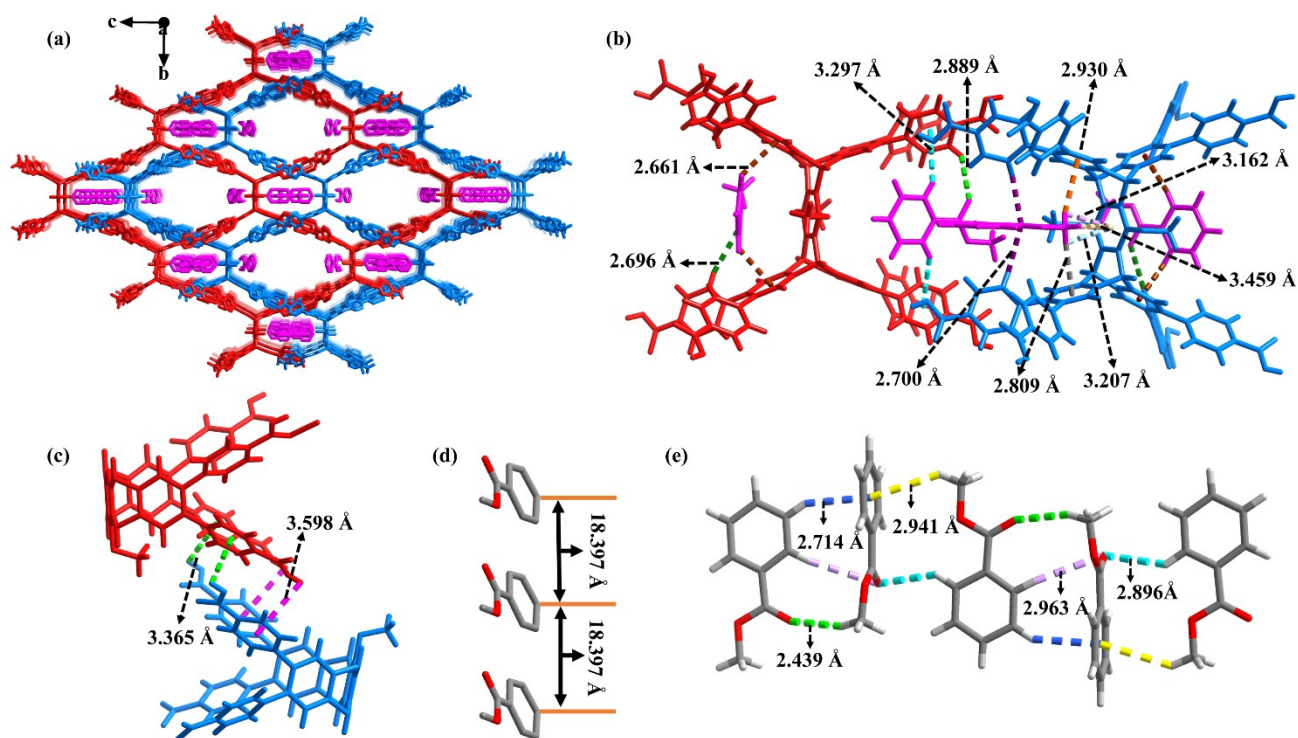

**Fig. S1** (a) SCXRD structure of NKM-HOF-2 showing its 2-fold interpenetrated 3D supramolecular framework. Two sets of independent networks are plotted in red and light blue. The pores are filled with two types of MB molecules, which are plotted in pink. H atoms are omitted for clarity. (b) Illustration of the multiple C-H $\cdots$  $\pi$  interactions formed among MB molecules and adjacent H<sub>8</sub>PEP-OMe molecules (Green dotted lines: stronger interactions; Cyan dotted lines: weaker interactions). (c) Illustration of the multiple C-H $\cdots$  $\pi$  interactions between adjacent H<sub>8</sub>PEP-OMe molecules. (d) The parallel arranged MB molecules in the large pores of NKM-HOF-2. (e) The MB molecules packed in the form of -[A-B-C-D]- in the small pores of NKM-HOF-2.

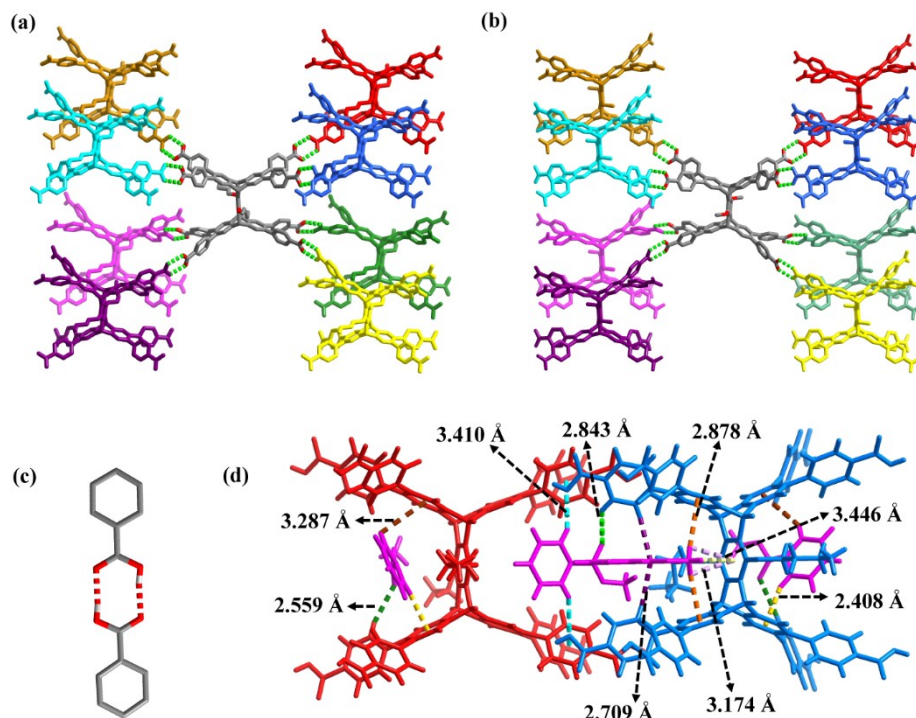

**Fig. S2** (a) Each H<sub>8</sub>PEP-OBu molecule in NKM-HOF-1 is connected to eight adjacent H<sub>8</sub>PEP-OBu molecules via C-H $\cdots$ O hydrogen bonds. (b) Each H<sub>8</sub>PEP-OMe molecule in NKM-HOF-2 is connected to eight adjacent H<sub>8</sub>PEP-OMe molecules via C-H $\cdots$ O hydrogen bonds. (c) The hydrogen-bonding pattern of the carboxyl group in NKM-HOF-1 and NKM-HOF-2. (d) The MB molecules form multiple C-H $\cdots$  $\pi$  interactions with adjacent H<sub>8</sub>PEP-OBu molecules in NKM-HOF-1.

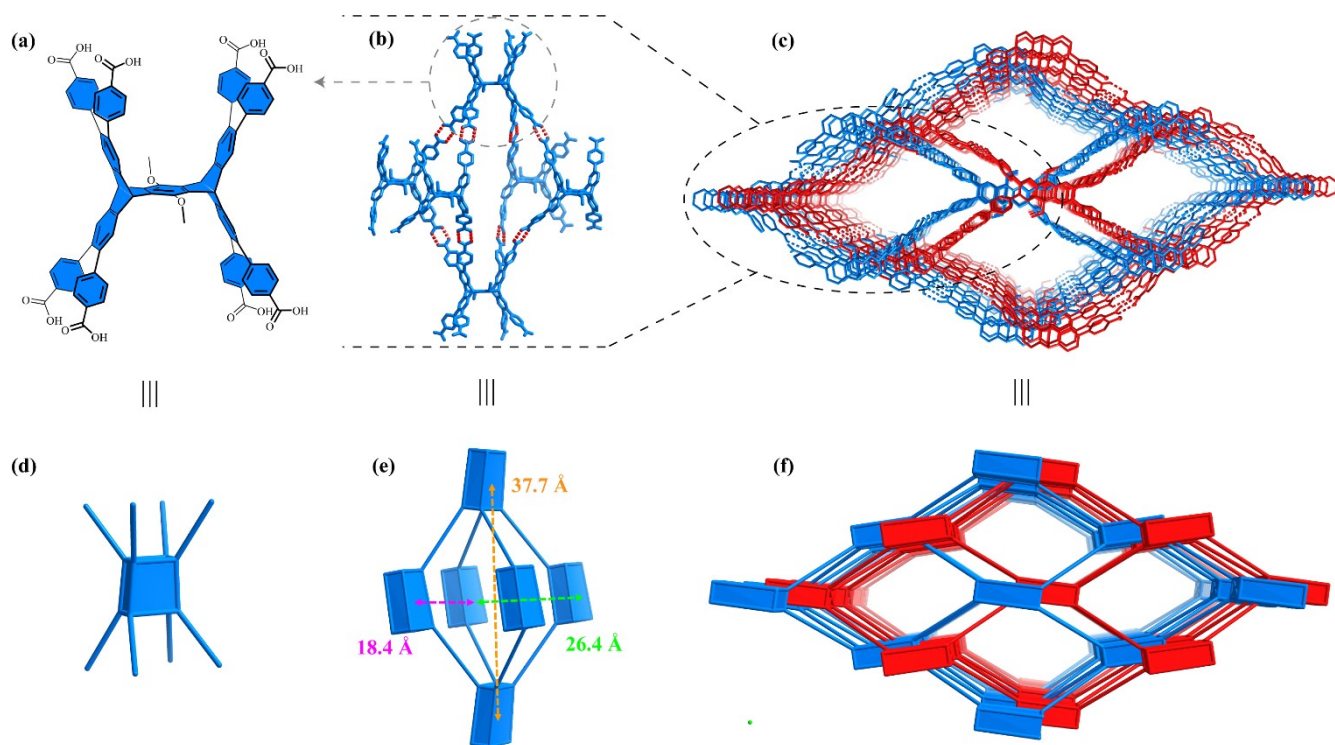

**Fig. S3** (a) The structure of H<sub>8</sub>PEP-OMe. (b) The octahedral cavities viewed from crystal structure (red dotted lines represent H-Bonds). (c) 2-fold interpenetrated frameworks of NKM-HOF-2 (each color represents an individual bcu net). (d) The 8-c quadrangular prism nodes simplified from H<sub>8</sub>PEP-OMe. (e) The octahedral cavities viewed from topological structure. (f) A simplified single-node 8-c bcu topology.

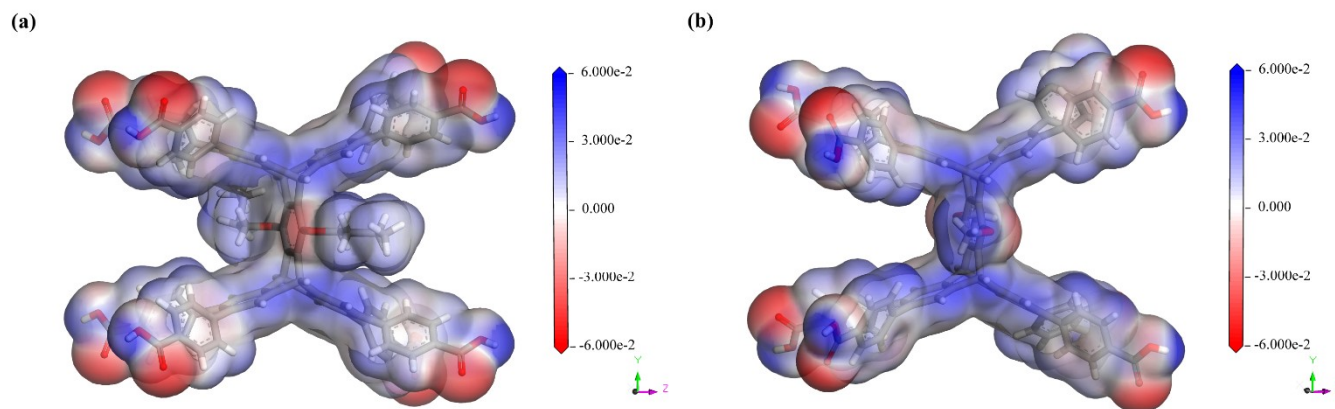

**Fig. S4** Electrostatic potential (ESP) diagram of (a) NKM-HOF-1 and (b) NKM-HOF-2.

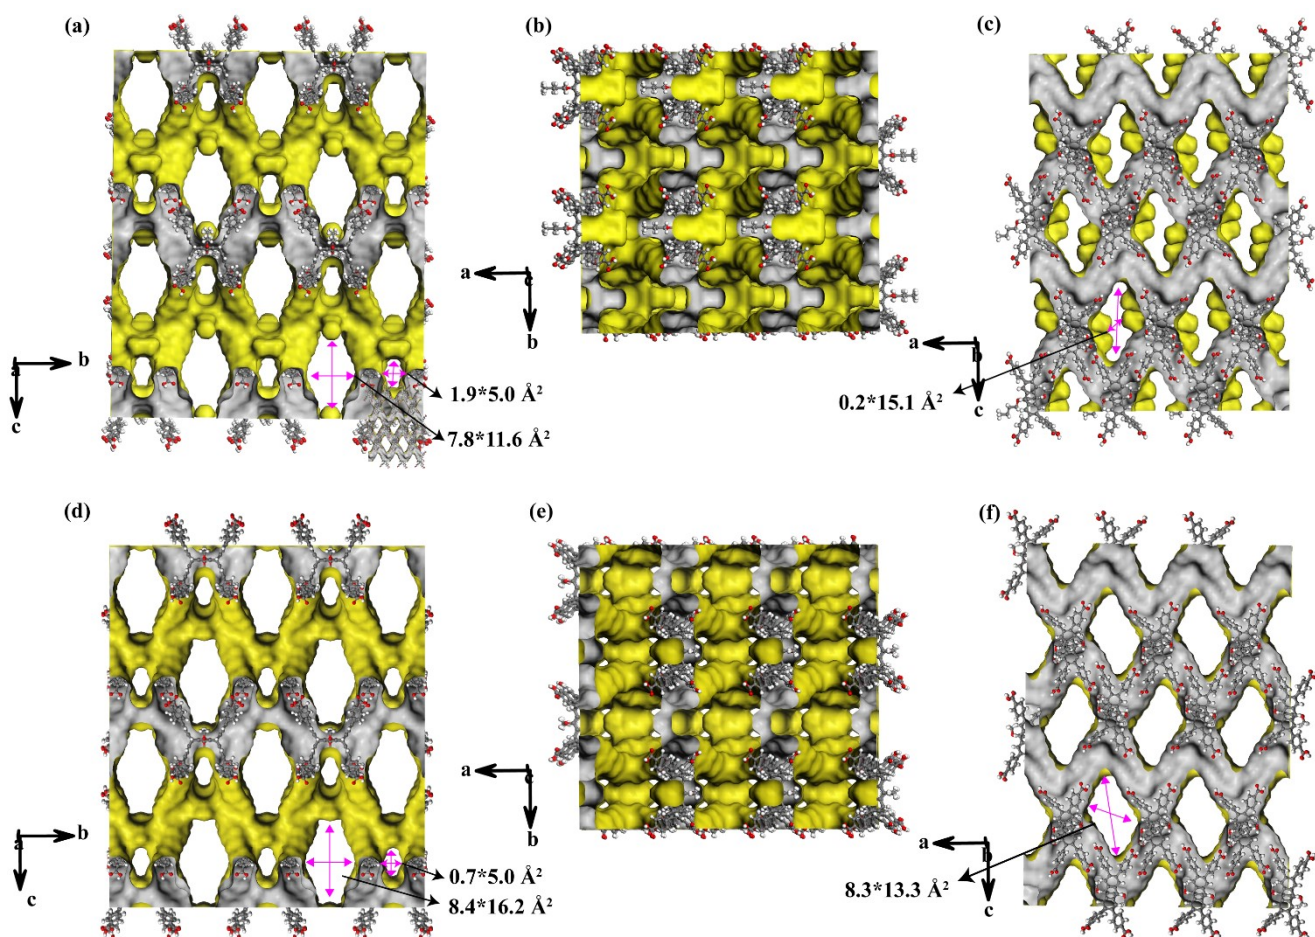

**Fig. S5** Visualized surface of the activated void in NKM-HOF-1 showing the pore surfaces of 2D channels heightened as yellow/grey (inner/outer) curved planes (a) along the *a*-axis, (b) along the *c*-axis, (c) along the *b*-axis. Visualized surface of the activated void in NKM-HOF-2 heightened as yellow/grey (inner/outer) curved planes (d) along the *a*-axis, (e) along the *c*-axis, (f) along the *b*-axis.

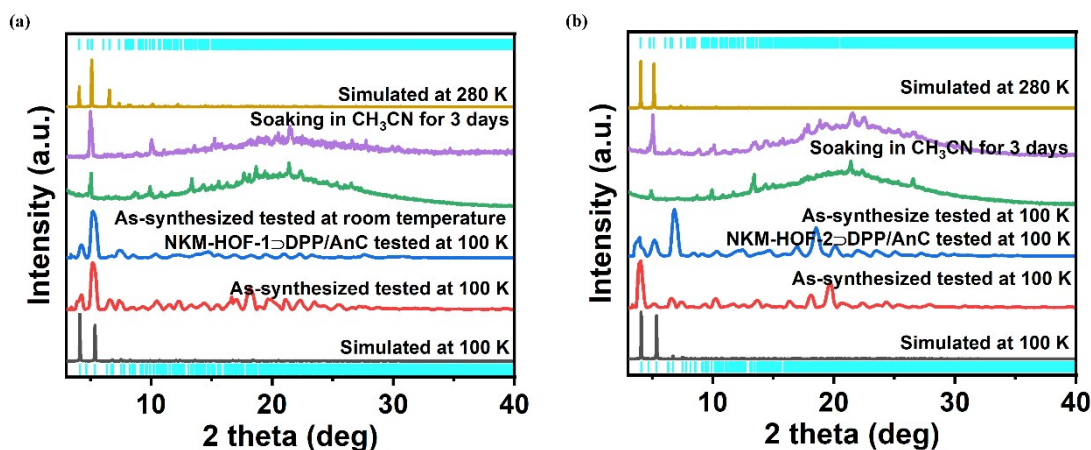

**Fig. S6** a) PXRD patterns of NKM-HOF-1 (in ascending order): simulated NKM-HOF-1 from 100 K single crystal data, as-synthesized NKM-HOF-1 measured by a single crystal diffractometer at 100 K, NKM-HOF-1-DPP/AnC tested at 100 K, as-synthesized NKM-HOF-1 measured by a powder X-ray diffractometer at room temperature, NKM-HOF-1 soaked in acetonitrile ( $\text{CH}_3\text{CN}$ ) for 3 days, and simulated NKM-HOF-1 from 280 K single crystal data. b) PXRD patterns of NKM-HOF-2 (in ascending order): simulated NKM-HOF-2 from 100 K single crystal data, as-synthesized NKM-HOF-2 measured by a single crystal diffractometer at 100 K, NKM-HOF-2-DPP/AnC tested at 280 K, as-synthesized NKM-HOF-2 measured by a powder X-ray diffractometer at room temperature, NKM-HOF-2 soaked in  $\text{CH}_3\text{CN}$  for 3 days, and simulated NKM-HOF-2 from 280 K single crystal data.

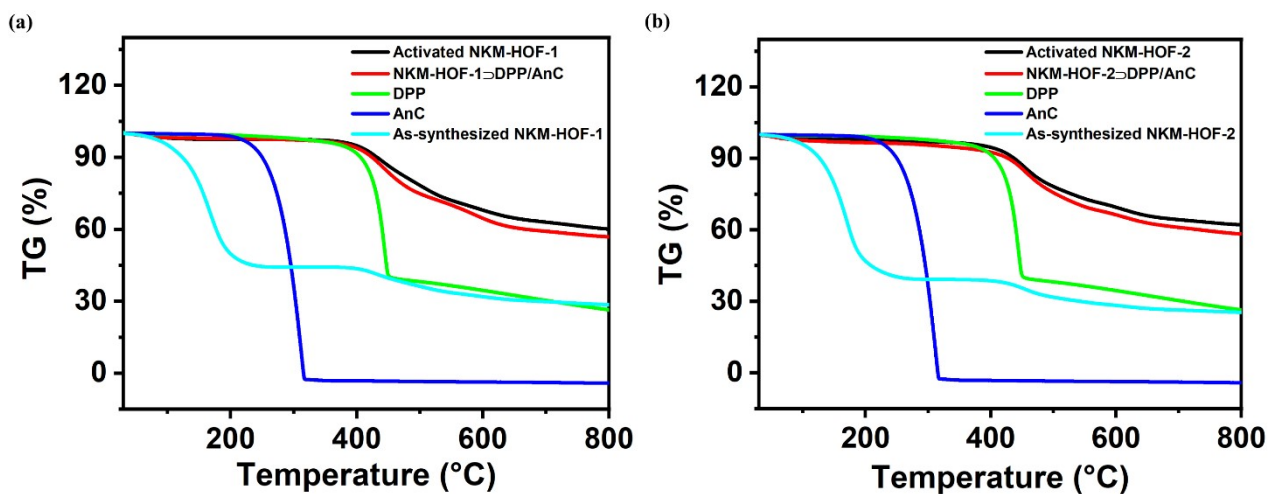

**Fig. S7** TG curves of (a) activated NKM-HOF-1, NKM-HOF-1 to dye, DPP, AnC, and as-synthesized NKM-HOF-1, (b) activated NKM-HOF-2, NKM-HOF-2 to dye, DPP, AnC, and as-synthesized NKM-HOF-2.

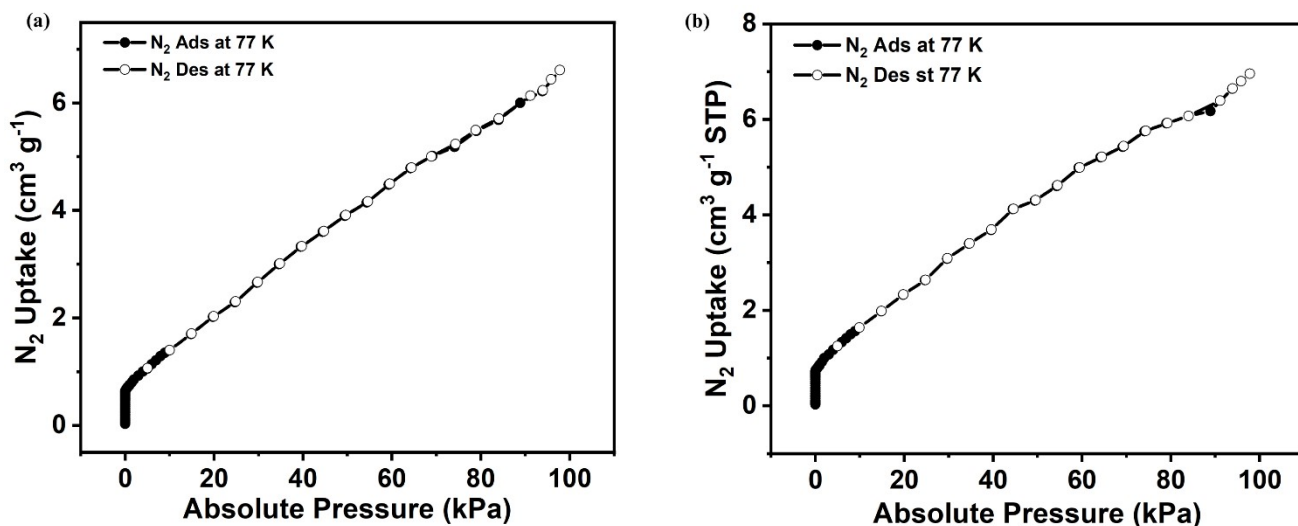

**Fig. S8** The  $N_2$  adsorption and desorption isotherms for supercritical  $CO_2$  activated (a) NKM-HOF-1 and (b) NKM-HOF-2 at 77 K.

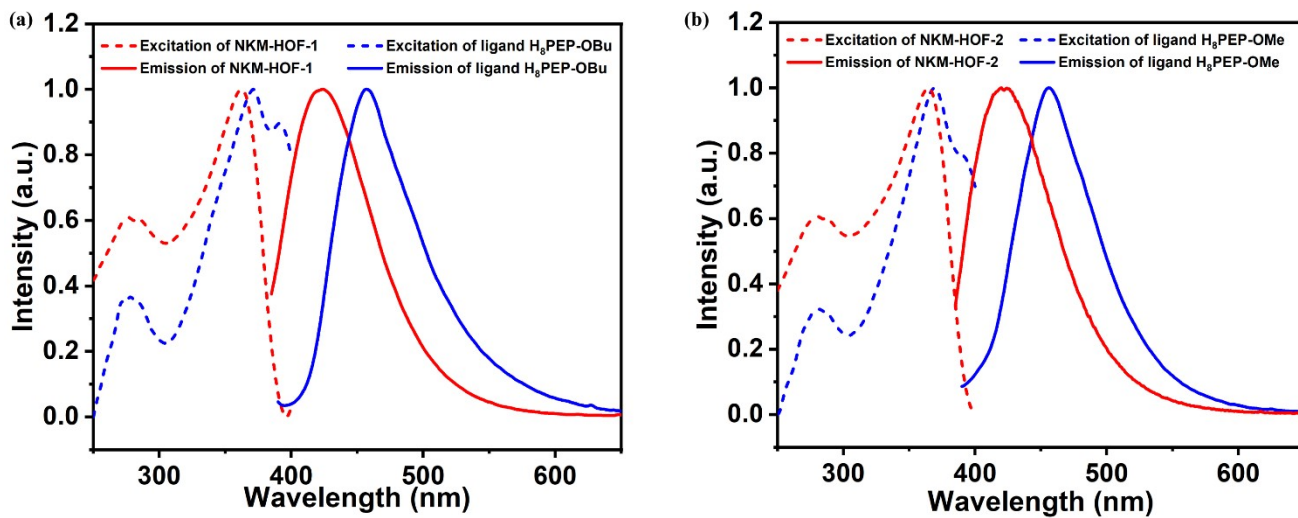

**Fig. S9** (a) PL spectra of NKM-HOF-1 and ligand  $H_8PEP-OBu$ . (b) PL spectra of NKM-HOF-2 and ligand  $H_8PEP-OMe$ .

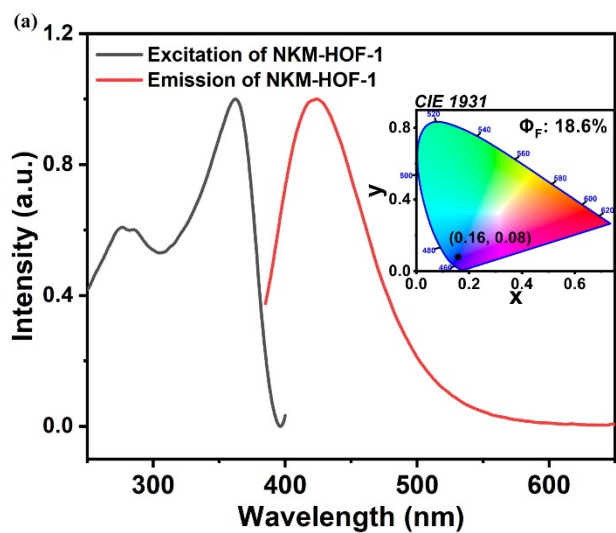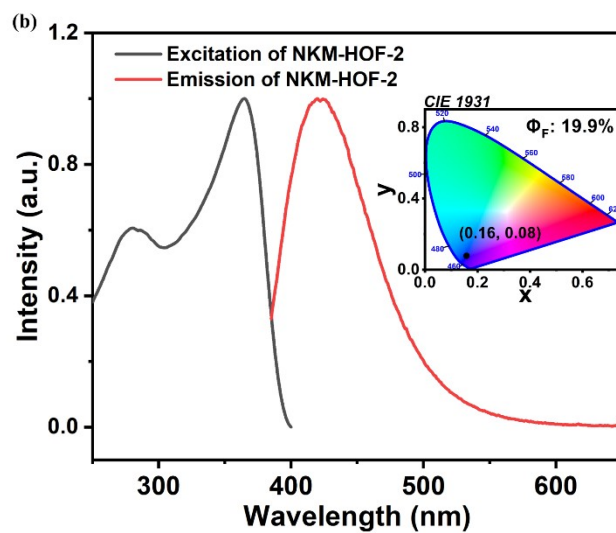

**Fig. S10** (a) PL spectra of NKM-HOF-1 (inset: CIE 1931 coordinate of emission of NKM-HOF-1 and quantum yields of NKM-HOF-1). (b) PL spectra of NKM-HOF-2 (inset: CIE 1931 coordinate of emission of NKM-HOF-2 and quantum yields of NKM-HOF-2).

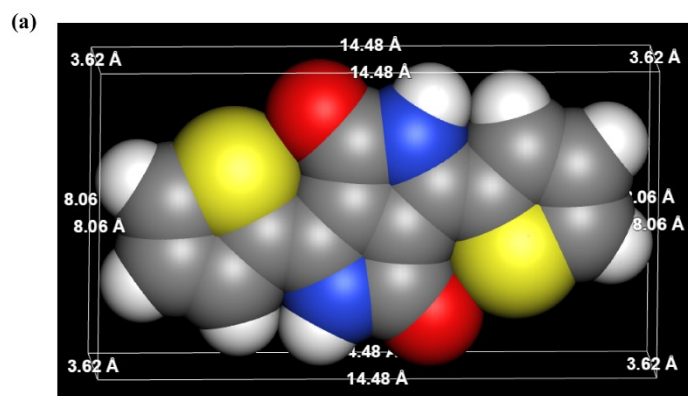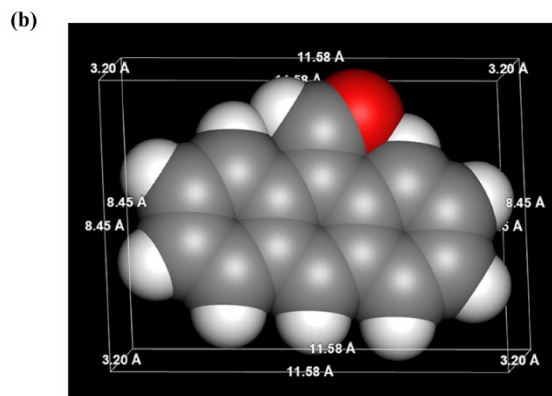

**Fig. S11** The molecular size of (a) DPP and (b) AnC.

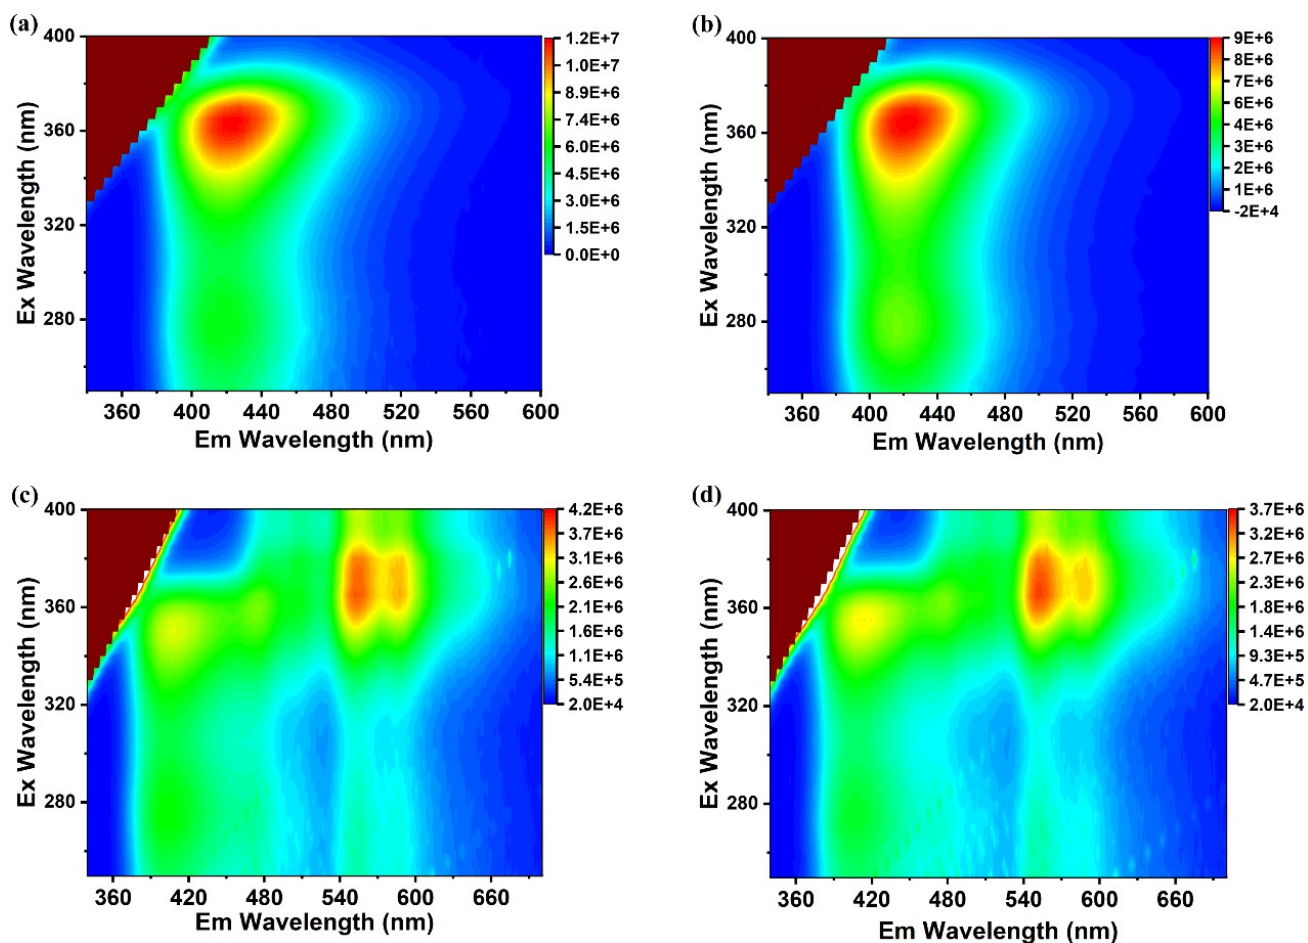

**Fig. S12** (a) 3D fluorescence spectra of NKM-HOF-1. (b) 3D fluorescence spectra of NKM-HOF-2. (c) 3D fluorescence spectra of NKM-HOF-1 $\supset$ DPP-0.13/AnC-3.5. (d) 3D fluorescence spectra of NKM-HOF-2 $\supset$ DPP-0.12/AnC-3.

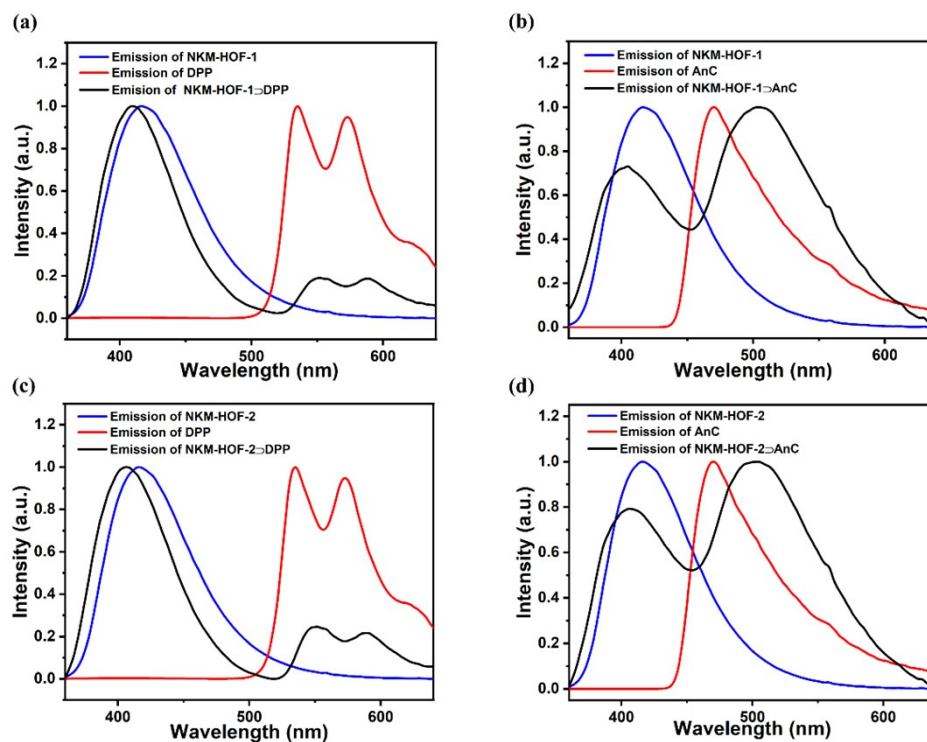

**Fig. S13** Under 330 nm excitation, the PL spectra of (a) NKM-HOF-1, the acetonitrile solution of DPP (0.12mmol/L), and NKM-HOF-1 $\supset$ DPP; (b) NKM-HOF-1, the acetonitrile solution of AnC (3.8 mmol/L), and NKM-HOF-1 $\supset$ AnC; (c) NKM-HOF-2, the acetonitrile solution of DPP (0.12 mmol/L), and NKM-HOF-2 $\supset$ DPP; (d) NKM-HOF-2, the acetonitrile solution of AnC (3.8 mmol/L), and NKM-HOF-2 $\supset$ AnC.

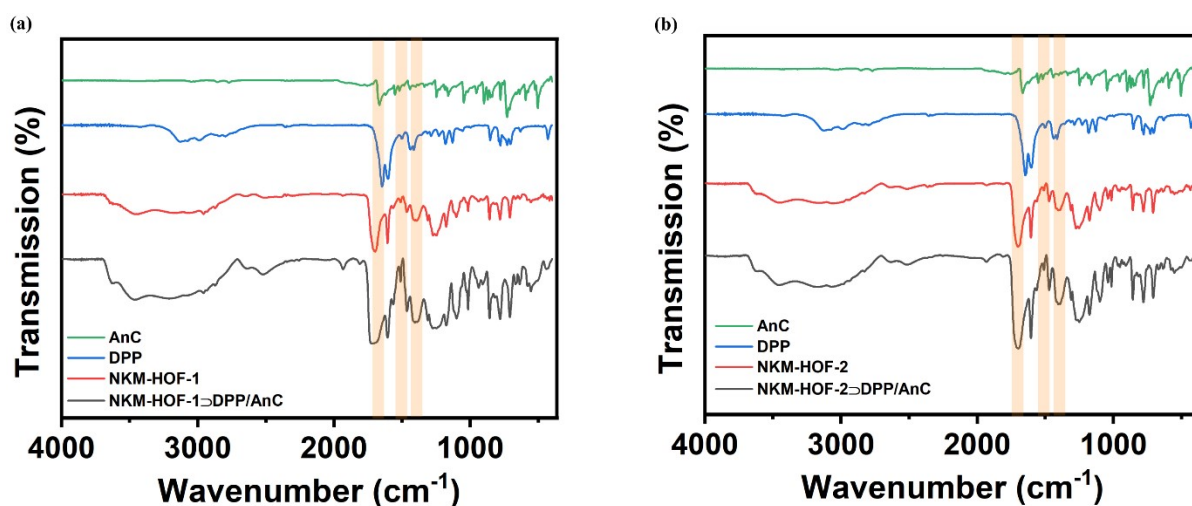

Fig. S14 a) FTIR spectra of AnC, DPP, NKM-HOF-1, and NKM-HOF-1-DPP/AnC. b) FTIR spectra of AnC, DPP, NKM-HOF-2, and NKM-HOF-2-DPP/AnC.

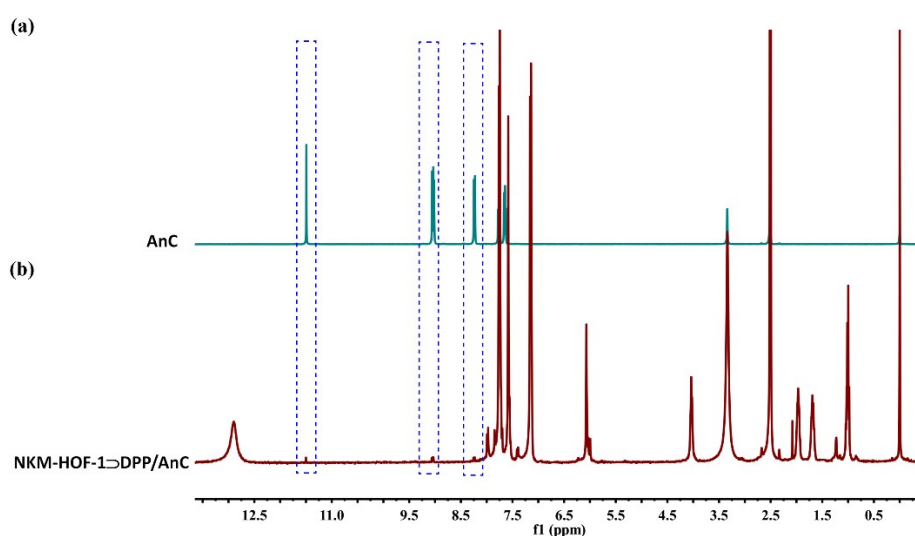

Fig. S15  $^1\text{H}$ -NMR spectra of a) AnC and b) NKM-HOF-1-DPP/AnC.

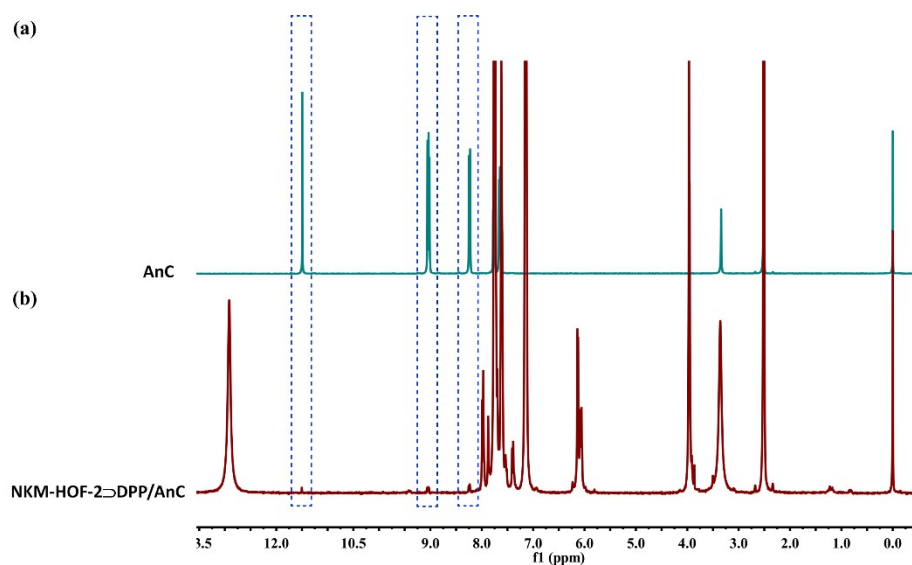

Fig. S16  $^1\text{H}$ -NMR spectra of a) AnC and b) NKM-HOF-2-DPP/AnC.

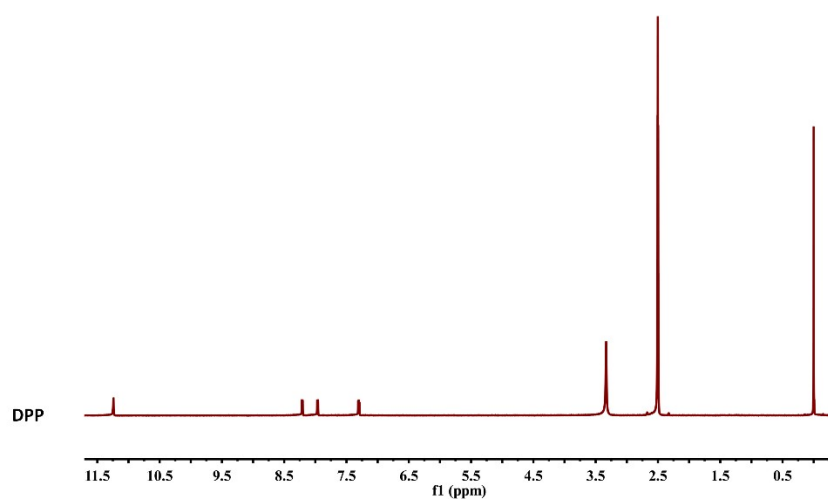

Fig. S17  $^1\text{H}$ -NMR spectra of DPP.

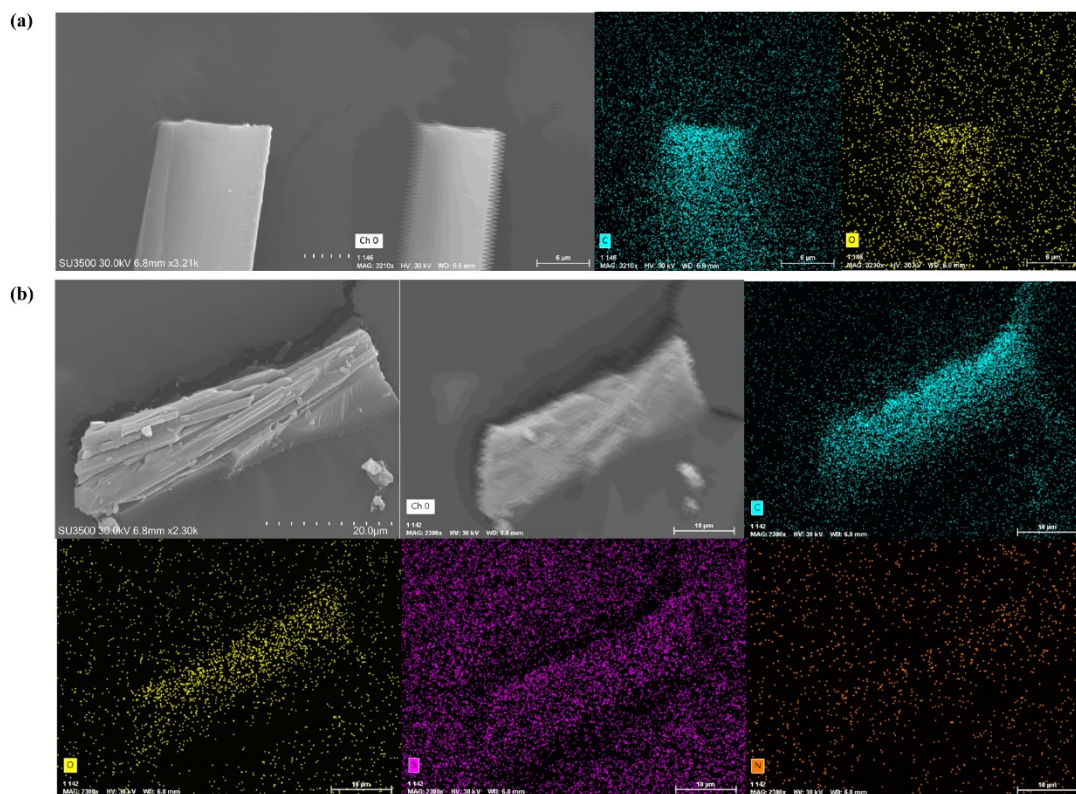

Fig. S18 EDS-mapping images of a) NKM-HOF-1 and b) NKM-HOF-1@DPP/AnC.

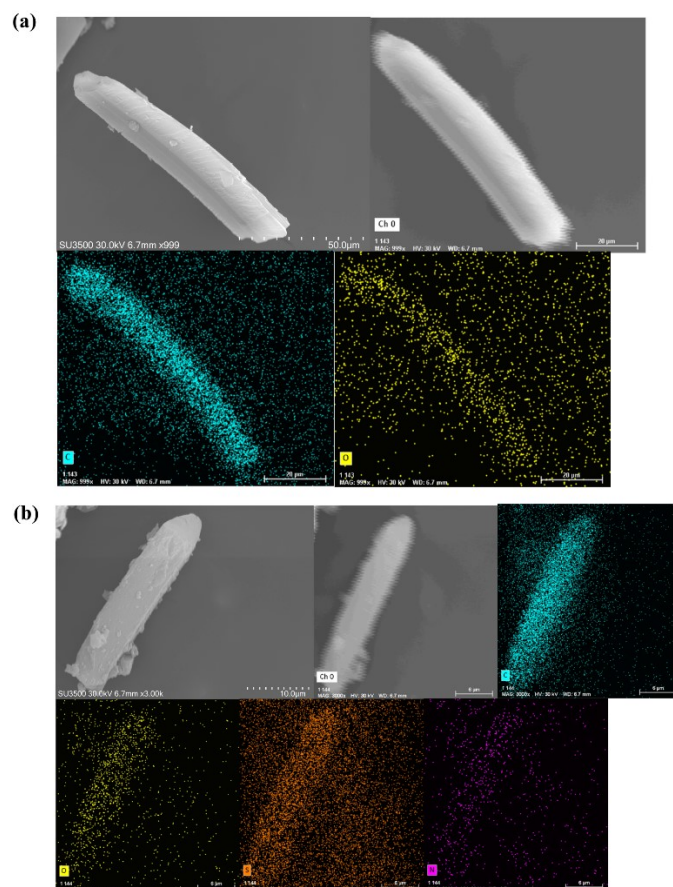

**Fig. S19** EDS-mapping images of a) NKM-HOF-2 and b) NKM-HOF-2 $\supset$ DPP/AnC.

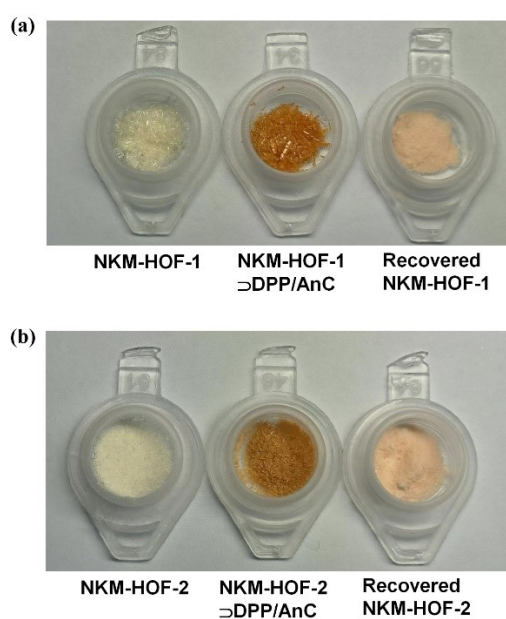

**Fig. S20** a) Photographs for samples of NKM-HOF-1, NKM-HOF-1 $\supset$ DPP/AnC, and recovered NKM-HOF-1. b) Photographs for samples of NKM-HOF-2, NKM-HOF-2 $\supset$ DPP/AnC, and recovered NKM-HOF-2. (NKM-HOFs $\supset$ DPP/AnC exchanged with acetonitrile at 60 °C for 4 days, and the fresh acetonitrile solution was changed three times a day to obtain the recovered sample).

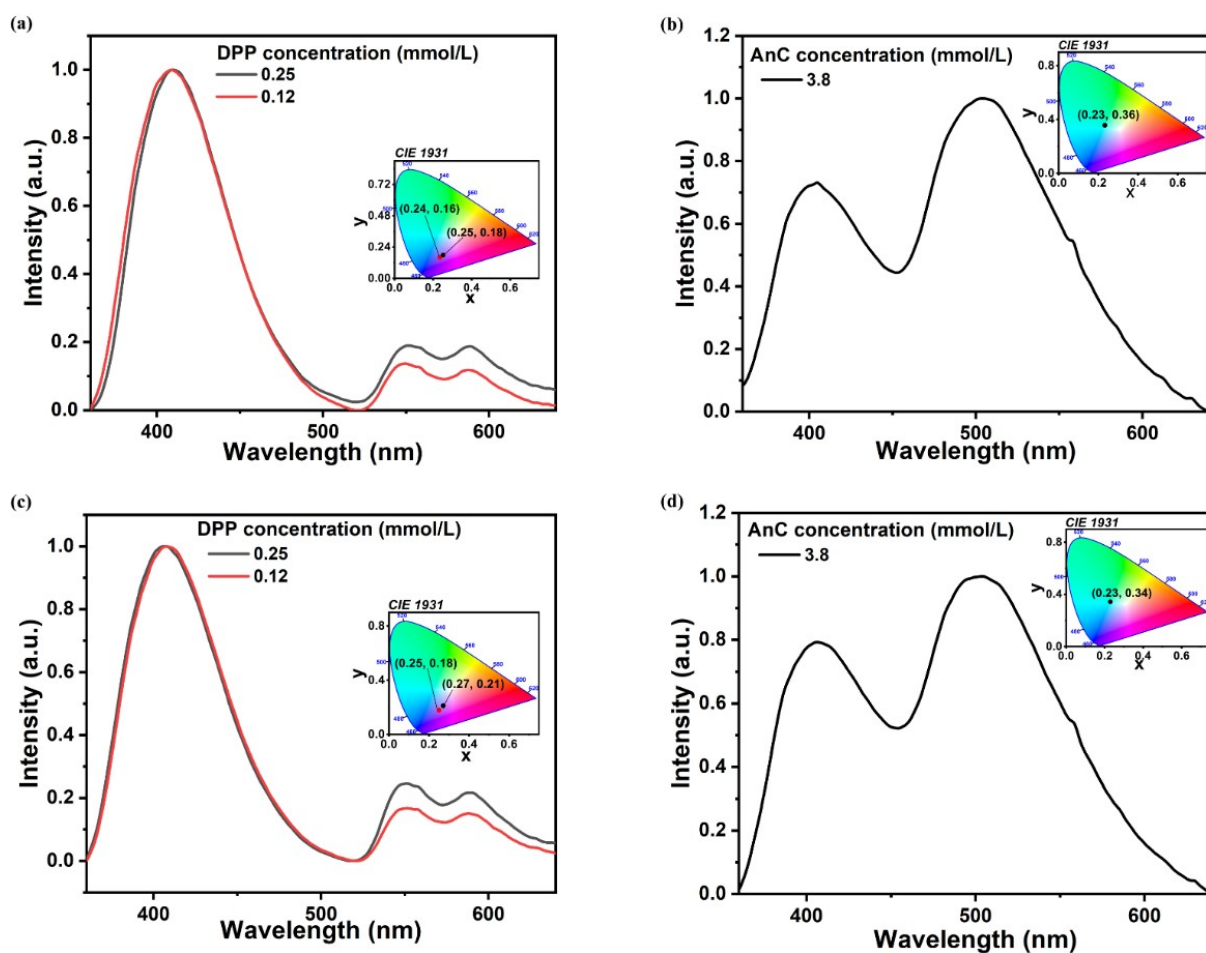

**Fig. S21** (a) PL spectra of NKM-HOF-1 $\supset$ DPP (inset: CIE 1931 coordinate of emission of NKM-HOF-1 $\supset$ DPP). (b) PL spectra of NKM-HOF-1 $\supset$ AnC (inset: CIE 1931 coordinate of emission of NKM-HOF-1 $\supset$ AnC). (c) PL spectra of NKM-HOF-2 $\supset$ DPP (inset: CIE 1931 coordinate of emission of NKM-HOF-2 $\supset$ DPP). (d) PL spectra of NKM-HOF-2 $\supset$ AnC (inset: CIE 1931 coordinate of emission of NKM-HOF-2 $\supset$ AnC).

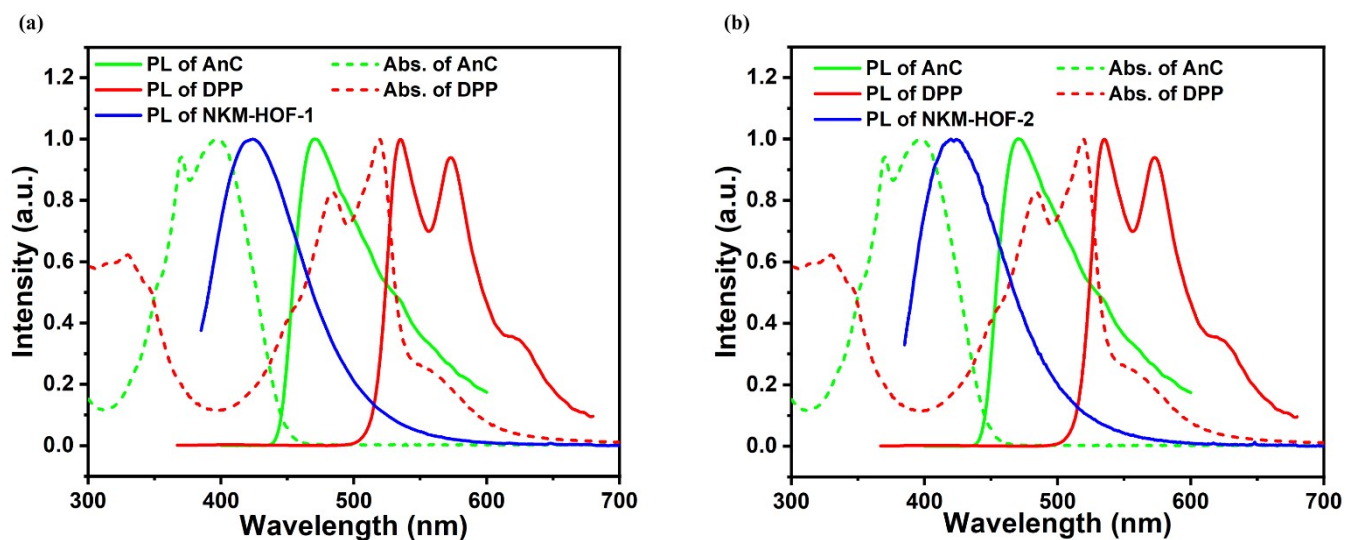

**Fig. S22** (a) Absorption and PL spectra of AnC and DPP in acetonitrile solution and PL spectra of NKM-HOF-1 crystal under 330 nm laser excitation. (b) Absorption and PL spectra of AnC and DPP in acetonitrile solution and PL spectra of NKM-HOF-2 crystal under 330 nm laser excitation.

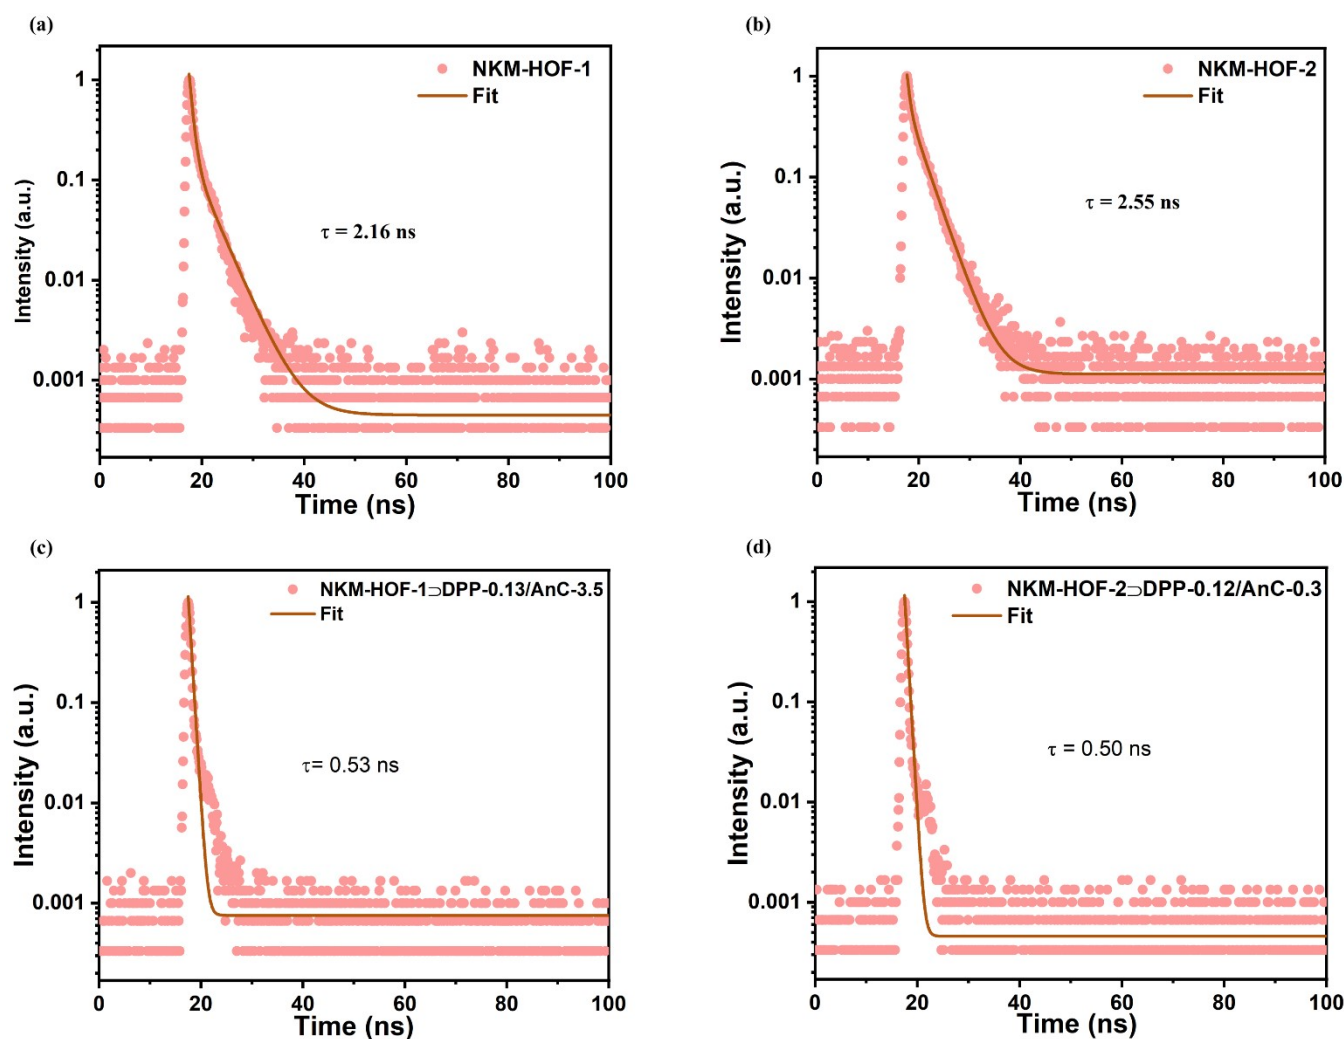

**Fig. S23** The decay spectra of 404 nm emission in NKM-HOF-1 (a), NKM-HOF-1⊃DPP-0.13/AnC-3.5 (b), NKM-HOF-2 (c), and NKM-HOF-2⊃DPP-0.12/AnC-0.3 (d) excited by 375 nm laser.

**Table S3** CIE coordinates of NKM-HOF-1⊃DPP/AnC.

| sample                     | CIE coordinates  |
|----------------------------|------------------|
| NKM-HOF-1⊃DPP-0.13/AnC-0.5 | (0.2442, 0.1957) |
| NKM-HOF-1⊃DPP-0.13/AnC-1   | (0.2488, 0.2214) |
| NKM-HOF-1⊃DPP-0.13/AnC-2   | (0.2615, 0.2569) |
| NKM-HOF-1⊃DPP-0.13/AnC-3   | (0.2696, 0.2948) |
| NKM-HOF-1⊃DPP-0.13/AnC-3.5 | (0.2853, 0.3287) |
| NKM-HOF-1⊃DPP-0.13/AnC-4   | (0.2938, 0.3639) |

## Energy transfer efficiency study by decay lifetime

The decreased lifetime of NKM-HOF-1 and NKM-HOF-2 reveals the efficient energy transfer process. The energy transfer efficiency<sup>[4]</sup> ( $\eta_{ET}$ ) and the rate constant of energy transfer ( $k_{ET}$ ) were calculated through Equation 1 and 2, respectively.  $\tau_{DA}$  and  $\tau_D$  are the fluorescence lifetimes of HOF-dye and pure HOF materials.

$$\eta_{ET} = 1 - (\tau_{DA}/\tau_D) \quad (1);$$

$$k_{ET} = \tau_{DA}^{-1} - \tau_D^{-1} \quad (2).$$

**Table S4** Fluorescence lifetimes ( $\tau$ ), the rate constant of energy transfer  $k_{ET}$ , and Energy transfer efficiency ( $\eta_{ET}$ ) and in NKM-HOF-1-DPP-0.13/AnC-3.5 and NKM-HOF-2-DPP-0.12/AnC-3.

| sample                             | NKM-HOF-1-DPP-0.13/AnC-3.5 | NKM-HOF-2-DPP-0.12/AnC-3 |
|------------------------------------|----------------------------|--------------------------|
| $\tau_{DA}$ (ns)                   | 0.53                       | 0.50                     |
| $\tau_D$ (ns)                      | 2.16                       | 2.55                     |
| $k_{ET}$ ( $10^9 \text{ s}^{-1}$ ) | 1.42                       | 1.61                     |
| $\eta_{ET}$                        | 0.75                       | 0.80                     |

**Table S5** Fluorescence lifetimes ( $\tau$ ) and quantum yields of NKM-HOF-1, NKM-HOF-2, NKM-HOF-1-DPP-0.13/AnC-3.5, and NKM-HOF-1-DPP-0.12/AnC-3.

| sample         | NKM-HOF-1 | NKM-HOF-2 | NKM-HOF-1-DPP-0.13/AnC-3.5 | NKM-HOF-2-DPP-0.12/AnC-3 |
|----------------|-----------|-----------|----------------------------|--------------------------|
| $\tau$ (ns)    | 2.16      | 2.55      | 0.53                       | 0.50                     |
| Quantity yield | 18.64%    | 19.94%    | 7.08%                      | 8.71%                    |

**Table S6** CIE coordinates of NKM-HOF-2-DPP/AnC.

| sample                     | CIE coordinates  |
|----------------------------|------------------|
| NKM-HOF-1-DPP-0.12/AnC-0.5 | (0.2581, 0.2085) |
| NKM-HOF-1-DPP-0.12/AnC-2   | (0.2957, 0.2919) |
| NKM-HOF-1-DPP-0.12/AnC-2.5 | (0.3013, 0.3145) |
| NKM-HOF-1-DPP-0.12/AnC-3   | (0.3162, 0.3374) |
| NKM-HOF-1-DPP-0.12/AnC-3.5 | (0.3209, 0.3498) |
| NKM-HOF-1-DPP-0.12/AnC-4   | (0.3235, 0.3625) |

## References

- [1] CryaAlisPro, Aligent Technologies. Version 1.171.36.31
- [2] G. M. Sheldrick, *Acta. Crystallogr. Sect. A* **2015**, 71, 3-8.
- [3] O. V . Dolomanov, L. J. Bourhis, R. J. Gildea, J. A. K. Howard, H. Puschmann, *J. Appl. Cryst.* **2009**, 42, 339-341.
- [4] M. Huang, Z. Liang, J. Huang, Y. Wen, Q.-L. Zhu, X. Wu, *ACS Appl. Mater. Interfaces* **2023**, 15, 11131-11140.
